# Supplementary material
Source: MDPI journal article supplement (https://www.mdpi.com/2073-4344/10/2/232)
Supplement: s1 [file s1]

## Supplementary Information

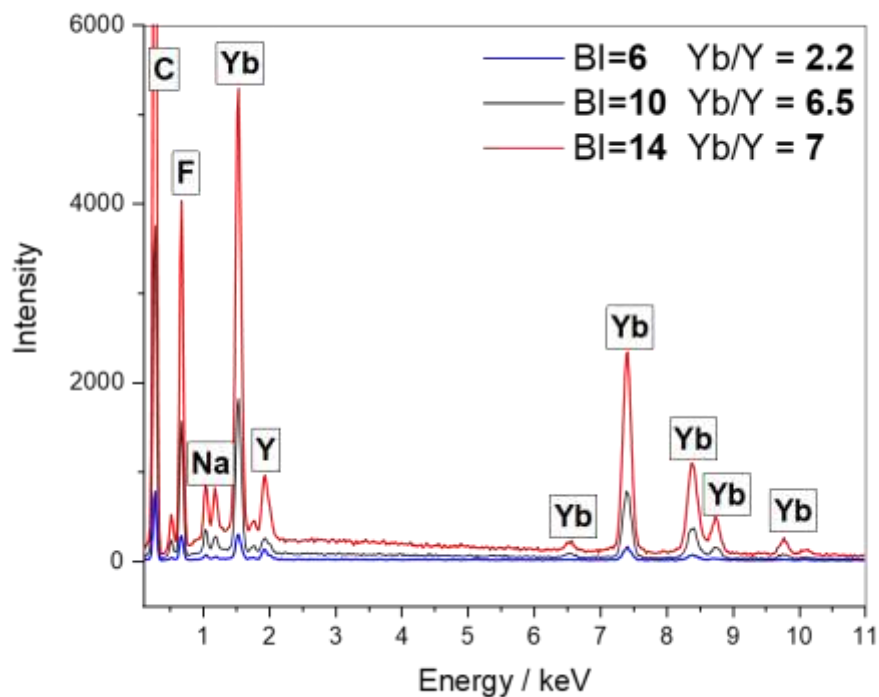

**Figure S1.** EDX analysis of the  $\text{NaYb}_{0.99}\text{F}_4:\text{Tm}_{0.01}@\text{NaYF}_4$  sample with different beam intensities (BI). The  $\text{Yb}^{3+}/\text{Y}^{3+}$  ions ratio is significantly increasing with the penetration depth, what indicates higher content of  $\text{Y}^{3+}$  ions at the surface of studied material.
